# Supplementary material for: Unraveling the Complexity of the Rhomboid Serine Protease 4 Family of Babesia bovis Using Bioinformatics and Experimental Studies
Source: MDPI journal article supplement (doi:10.3390/pathogens11030344), 2022-03-12
Supplement: s1 [file s1]

Supplementary Figure S1. Clustal omega alignment of ROM4 paralogs of *B. bovis*, T2Bo strain

|     |                                                                 |     |
|-----|-----------------------------------------------------------------|-----|
| 4_1 | -----                                                           | 0   |
| 4_2 | -----                                                           | 0   |
| 4_5 | MGDNDSDNKKANRHSLSNAIKGGFVKDMVNRGFRKKINDSDKNDDSKDKGGEKPSNVSK     | 60  |
| 4_3 | MGDNDSDNKKANRHSLSNAIKGGFVKDMVNRGFRKKINDSDKNDDSNVDGSPNDIT----    | 56  |
| 4_4 | MGDNDSDNKKANRHSLSNAIKGGFVKDMVNRGFRKKINDSDKNDDSNVDGSPNDIT----    | 56  |
|     |                                                                 |     |
| 4_1 | -----                                                           | 0   |
| 4_2 | -----                                                           | 0   |
| 4_5 | DSSMKAGNVAALRDQFKRAAEKDESKDQNSQAGQSSSLTSKAPLGDPRDQARAKFLAE      | 120 |
| 4_3 | DKGHRNA-----GIEDSENILSQA-----QSDTKDKPVSVAKSLAE                  | 92  |
| 4_4 | DKGHRNA-----GIEDSENILSQA-----QSDTKDKPVSVAKSLAE                  | 92  |
|     |                                                                 |     |
| 4_1 | -----                                                           | 0   |
| 4_2 | -----                                                           | 0   |
| 4_5 | KYEKILAARNMVEESASRALQRPATSTPAKIPASVSGVSKEPKDTSEQPRPSKAEPSPST    | 180 |
| 4_3 | KYERGLFNRNKVD-----                                              | 106 |
| 4_4 | KYERGLFNRNKVD-----                                              | 106 |
|     |                                                                 |     |
| 4_1 | -----                                                           | 0   |
| 4_2 | -----MPCKYP                                                     | 6   |
| 4_5 | TPSTSLGPQEPKDTSEQPRPSKAEPSPSTTPSTSLGPEPKDTSEQPRPSKAEPSPSTTP     | 240 |
| 4_3 | -----SLISKAESQPSTTP                                             | 120 |
| 4_4 | -----SLISKAESQPSTTP                                             | 120 |
|     |                                                                 |     |
| 4_1 | -----MKDEIEFS                                                   | 9   |
| 4_2 | SV-----SGVS--IDR                                                | 15  |
| 4_5 | STSLGPEPKDTSEQPRPSKAESKLSLTLKSLRFSRESRSVIKGTGSGFGSSQVSSNAGR     | 300 |
| 4_3 | STSMGS-----SEIKGARAFGSSQVSSNAGR                                 | 147 |
| 4_4 | STSMGS-----SEIKGARAFGSSQVSSNAGR                                 | 147 |
|     |                                                                 |     |
| 4_1 | -----DEEPTQTGEVHLA---SPEIEAPQKVPKTKVIVNRRSPINPLE--KLAYVAGF      | 59  |
| 4_2 | WESALYDEKPVKTVEITQCSTAEPEEVSTGA-----EPPSEAMTHRLCKWIFDL          | 65  |
| 4_5 | RVHTLADTASTDDASIRQA---MSQSFSSPGV-----SQPEPERASRGRNMFGM          | 347 |
| 4_3 | RVHTLADTASTDDASIRQA---MSQSFSSPGV-----SQPEPERASRGRNMFGM          | 194 |
| 4_4 | RVHTLADTASTDDASIRQA---MSQSFSSPGV-----SQPEPERASRGRNMFGM          | 194 |
|     | : . . . . : . . . : * : : . :                                   |     |
|     |                                                                 |     |
| 4_1 | KNNEDNIVKGSDFMLEKNPLGLRPFMLMINFALVLIFFITQLVFNITFNGRCISSVLY      | 119 |
| 4_2 | VNKLKCYCIRK---DSADHDVSGKLVLRRTALIIYSTAYICSLVLNKTTFDGKCMGNVDF    | 121 |
| 4_5 | RR-RPCWIRI---QVKEKIFPGKMILAISTTILIVVFMFELFINRATFNRCIGEVDI       | 402 |
| 4_3 | RR-RPCWIRI---QVKEKIFPGKMVLAISTTILMIVVFLFELLNKTTFNRCIGQVDI       | 249 |
| 4_4 | RR-RPCWIRI---QVKEKIFPGKMVLAISTTILMIVVFLFELLNKTTFNRCIGQVDI       | 249 |
|     | . * : . . * : . : : : * : * : * : * : * : * : *                 |     |
|     |                                                                 |     |
| 4_1 | PAIQTGREAIKPIVEFGYGAECYNLKTSTANRVFFGESASDEGWPKKEYLQKLVTAASSA    | 179 |
| 4_2 | GYGTLG---HPPFSLGYNACTQNTKTKIIEPNFHIHQNTGQVLLVWKENERWH---D       | 174 |
| 4_5 | THRHEG---KAILSYLGVGCENNLKTTAERGFGLGAGASDKGYVVDVYHKNLATSLSA      | 458 |
| 4_3 | SNRLAG---KSTLSFIGYVGCENNLKTTAERGFGLGAAASDAGYPDDIVTDGRLAHAPA     | 305 |
| 4_4 | SNRLAG---KSTLSFIGYVGCENNLKTTAERGFGLGAAASDAGYPDDIVTDGRLAHAPA     | 305 |
|     | * : * : * : * : * : * : * : * : * : * : * : *                   |     |
|     |                                                                 |     |
| 4_1 | SSDAPNERVYNLLGGLSTNVMRNYEYRVFWSMFLHSSWKHLFFNVFCIQALWIEPD        | 239 |
| 4_2 | RISEPGSQSLTVLGAVDTNHIRIYGEWFRIFTGIIHLHAGWFHLLNNAIHFIVLYIEPE     | 234 |
| 4_5 | PPDGPNYRIGTIVGALSANTIRIYGESSRLTSLIFLHGGRWHLNCLNMLNMLLYVIEPD     | 518 |
| 4_3 | VVDGPNVRIASIIIGAVSANEVRLYNEKFRILSAIFLHAGFTLFTNCLNMLNMLLYVIEPD   | 365 |
| 4_4 | VVDGPNVRIASIIIGAVSANEVRLYNEKFRILSAIFLHAGFTLFTNCLNMLNMLLYVIEPD   | 365 |
|     | . * : . . * : * : * : * : * : * : * : * : * : * : * : *         |     |
|     |                                                                 |     |
| 4_1 | WGFMRMTGLFLISIGGNLTGAVLSPCGLTVGSSGAMYGLYGAMIPYCIYWNTPRPVF       | 299 |
| 4_2 | WGFYRTLLGYFVTGCGSYLAGAVFIPCLRQIGSSGVHFGFIGAIAPYCVENWYRMGSPVI    | 294 |
| 4_5 | WGFKRTLALYIFGYSANLVHASMSPCPCWASGSLFLSYLGFAPYPTVEHWDNLRSPMA      | 578 |
| 4_3 | WGFKRTLALYLVAGIIGGNLVHTSMSPCPCWASGSLFLSYLGFAPYPTVEHWDNLRSPMA    | 425 |
| 4_4 | WGFKRTLALYLVAGIIGGNLVHTSMSPCPCWASGSLFLSYLGFAPYPTVEHWDNLRSPMA    | 425 |
|     | ** * * * : : . . * : * : * : * : * : * : * : * : * : * : * : *  |     |
|     |                                                                 |     |
| 4_1 | LFCYNIITLIIIGFLMGLAPNVDNYCHIGCVFGLWGFATIKSVSSCDKCTIVERSLLCP     | 359 |
| 4_2 | VLSLILLVPLLDLCI--KEADIGIQIHLGGYIFGMLYGFSTIKAVTLFEDKGVYRYFTIKF   | 353 |
| 4_5 | LIVIAITISLLEIIL--PGVGSNHAHLGGFAFGLCFGFATLKSVSADFDRGALWSRIALRF   | 637 |
| 4_3 | LLLISVAFVSIIEFFS--FVRGVSKHAHLGGFAFGLCFGFATLKSVSADFDRGALWSRIALRF | 484 |
| 4_4 | LLLISVAFVSIIEFFS--FVRGVSKHAHLGGFAFGLCFGFATLKSVSADFDRGALWSRIALRF | 484 |
|     | : : : : : . . * : * : * : * : * : * : * : * : * : * : *         |     |
|     |                                                                 |     |
| 4_1 | LISWALPQKWKAKRLIIIVFKKDRGRNRQKDMAQKHAVQNGVTPRRIALIKKKFERQGA     | 419 |
| 4_2 | FSRWLKESTRN--LYIRKVVKACQIEE---MNRIQYENQAKSSTCGFFMKRLFGVYPL      | 407 |
| 4_5 | SSRLSPEAVQK---HQAKVVKSQAQSEE---ILRIKYEQGAKDSANRLRFVVRMFGIYYP    | 690 |
| 4_3 | SSRLSPEAVQK---HQAKVVKSQAQSEE---ILRIKYEQGAKDSANRLRFVVRMFGIYYP    | 537 |
| 4_4 | SSRLSPEAVQK---HQAKVVKSQAQSEE---ILRIKYEQGAKDSANRLRFVVRMFGIYYP    | 537 |
|     | : * : * : : . . : : : : : : : : * : * : *                       |     |
|     |                                                                 |     |
| 4_1 | PPCRMRLREWIFRITSLMMVL-----LFTILGLFLSKPELYAKFPPGGEYKL            | 467 |
| 4_2 | GPYRMRPRDWTTRGIFSCLMVI-----LMTFLILMLCFEPLYSFNPVTSVSAF           | 455 |
| 4_5 | GPYRMRRLRDVLRVFLCAL-----IAMVFFYLATFYESVYKNIIDRNATILF            | 738 |
| 4_3 | GPYRMRRLRDVLRVFLCAL-----IAMVFFYYSTFNERFYTWLNRAGIRFV             | 585 |
| 4_4 | GPYRMRRLRDVLRVFLCALVQPVFTYTPQIAMVFFYYSTFNERFYTWLNRAGIRFV        | 597 |
|     | * * * * * : : * : : : : : : : * : * : *                         |     |
|     |                                                                 |     |
| 4_1 | SGWQTCCECFITNIEKLFSGHRDIPAQYL--NRKLFWCFNVDDAKHFCGGDYAKTAPMDN    | 526 |
| 4_2 | --TQTCICCYIKIRNKSAL---QRLQVLDLAGYFCFRSKEYANRYCF-----            | 498 |
| 4_5 | --SRACHCGYFKS--SGDEL---LLNQIGNLAGKFCYFDSEASARDKFCVAVSG-----     | 783 |
| 4_3 | --SPLCHCGYLRDLTGPSI---LSKQIGSLAGKYCYQSEALWNVFCEK-----           | 629 |
| 4_4 | --SPLCHCGYLRDLTGPSI---LSKQIGSLAGKYCYQSEALWNVFCEK-----           | 641 |
|     | * * : : : * : : : : * : * : * : * : *                           |     |
|     |                                                                 |     |
| 4_1 | ILKSSHDAALGLINTVTEAIK                                           | 547 |

|     |       |     |
|-----|-------|-----|
| 4_2 | ----- | 498 |
| 4_5 | ----- | 783 |
| 4_3 | ----- | 629 |
| 4_4 | ----- | 641 |

**Supplementary Figure S2.** Clustal omega alignment of intergenic regions upstream to *rom4.3* (Int3), *rom4.4* (Int4) and *rom4.5* (Int5)

|      |                                                                                    |     |
|------|------------------------------------------------------------------------------------|-----|
| Int3 | TTTGGTGACAGACTAGACTATCAGAATAATGGCCACGAGCACAATCTCACACATATGTAA                       | 60  |
| Int5 | TTTGGTGACAGACTAGACTATCAGAATAATGGCCACGAGCACAATCTCACACATATGTAA                       | 60  |
| Int4 | TTTGGTACACAACATACTATCAATAATGGCCACGAGCACAATCTCACACATATGTAA                          | 60  |
|      | ***** ** * ** * ** * ** * ** * ** * ** * ** * ** * ** * ** * ** * ** * ** * **     |     |
| Int3 | ACAAAAACCAACACACGCCAAAAATGGCAATCTAGTATATTAGATGATAAAAGTCTGT                         | 120 |
| Int4 | ACAAAAACCAACACACGCCGGAAATAGTAATATTTTATAGTAGTCTATAAAGAAATGT                         | 120 |
| Int5 | ACAAAAACCAACACACGCCGGAAATAGTAATGTTTATATTAATATAAAGAGATGT                            | 120 |
|      | ***** ** * ** * ** * ** * ** * ** * ** * ** * ** * ** * ** * ** * ** * ** * **     |     |
| Int3 | TATTTTAAAGAATCATTACACAGAGCACTGCACCGTCATAGGAATAAATACGTCGTGCA                        | 180 |
| Int4 | GATGTCGATATATTTCGTGAGTTG-CATATCTCGCACATCAACGTGAATAATCAATAATA                       | 179 |
| Int5 | AATATTAAGAATCTTCTTTAAA-GTACTGCACCGTCACATGAATAAATAACCCCGTGCA                        | 179 |
|      | ** * * * * * * * * * * * * * * * * * * * * * * * * * * * * * * * * * * * * * * * * |     |
| Int3 | TGCAAGTCTTCCATAAAAGAATAACTAAAAATAAATGACGAAGCCATTTAGTGAACA                          | 240 |
| Int4 | CGCATGTAATAGGGATGCAACAC--ACGCCAATTACACATCAAGGGTAAATAGAACA                          | 237 |
| Int5 | TGCAAGTCTTCCAGATAAGAATAA--GTAAAAATGAATAATTCGGCTAATCAATAGAACA                       | 237 |
|      | ** * * * * * * * * * * * * * * * * * * * * * * * * * * * * * * * * * * * * * * * * |     |
| Int3 | CATCCATTGATGACACATGTTTTCGTGTTGTATATTAGTTTTACGTGTATACACCCCTGGG                      | 300 |
| Int4 | CATCCATTGATGACACATGTTTTCGTGTTGTATATTAGTTTTACGTGTATACACCCCTGGG                      | 297 |
| Int5 | CATCCATTGATGACATATGTTTTCGTGTTGGATATTAGTTTTACGTGTATACAGCCTAGG                       | 297 |
|      | ***** ** * ** * ** * ** * ** * ** * ** * ** * ** * ** * ** * ** * ** * ** * **     |     |
| Int3 | TAATATATATACAATCCCATCACACATCTGTCGTATACAAAACGAATATCAGTCGTCTA                        | 360 |
| Int4 | TAATATATATACAATCCCATCACACAGCTGCCTATATAAA---ATAATATAAGTCGCCTA                       | 354 |
| Int5 | TAATATATCTACAATCCCATCACACAGCTGCCTATATAAA---ATAATATAAGTCGCCTA                       | 354 |
|      | ***** ** * ** * ** * ** * ** * ** * ** * ** * ** * ** * ** * ** * ** * ** * **     |     |
| Int3 | CACACTTTGTAAACAACCGAATGTGTAGTGCATTAGACCGGTAAACACAATGCTAATAGA                       | 420 |
| Int4 | CACACTTTGTAAACAACCGAATGTGTAGTGCATTAGACCGGTAAACACAATGCTAATAGA                       | 414 |
| Int5 | CACACTTTGTAAACAACCGAATGTGTAGTGCATTAGACCGGTAAACACAATGCTAATAGA                       | 414 |
|      | ***** ** * ** * ** * ** * ** * ** * ** * ** * ** * ** * ** * ** * ** * ** * **     |     |
| Int3 | GGCATAAAACCACAAGGGTCACTGAATAAAAACGGTAGATTACATAT-----                               | 467 |
| Int4 | GGCATAAAACCACAAGGGTCACTGAATAAAAACGGTAGATTACATATAACGTGTTATATG                       | 474 |
| Int5 | GGCATAAAACCACAAGGGTCACTGAATAAAAACGGTAGATTACATATAACGTGTTATATG                       | 474 |
|      | ***** ** * ** * ** * ** * ** * ** * ** * ** * ** * ** * ** * ** * ** * ** * **     |     |
| Int3 | -----                                                                              | 467 |
| Int4 | CCTTGTGGTCAACAACCTTACCACGTTTGTGATTGGCGCCATCCCGTCAATAGTACCT                         | 534 |
| Int5 | CCTTGTGGTCAACAACCTTACCACGTTTGTGATTGGCGCCATCCCGTCAATAGTACCT                         | 534 |
|      | ***** ** * ** * ** * ** * ** * ** * ** * ** * ** * ** * ** * ** * ** * ** * **     |     |
| Int3 | -----                                                                              | 467 |
| Int4 | TATTTACGACGATATAGCACAGATAATGGTCTAACAAAAGTATGTTACACATTGTTTAC                        | 594 |
| Int5 | TATTTACGACGATATAGCACAGATAATGGTCTAACAAAAGTATGTTACACATTGTTTAC                        | 594 |
|      | ***** ** * ** * ** * ** * ** * ** * ** * ** * ** * ** * ** * ** * ** * ** * **     |     |
| Int3 | -----                                                                              | 467 |
| Int4 | ATGCTTACGCAAGGAAGATGCGCAGTCGGTTTCGACCCGAGGGCAGAAGTGGTTCAACCA                       | 654 |
| Int5 | ATGCTTACGCAAGGAAGATGCGCAGTCGGTTTCGACCCGAGGGCAGAAGTGGTTCAACCA                       | 654 |
|      | ***** ** * ** * ** * ** * ** * ** * ** * ** * ** * ** * ** * ** * ** * ** * **     |     |
| Int3 | -----                                                                              | 467 |
| Int4 | GCTAACAGCATTATCTTTCTAATCGCTGATTGACTTTTTACATAGTGATGAATGTGA                          | 714 |
| Int5 | GCTAACAGCATTATCTTTCTAATCGCTGATTGACTTTTTACATAGTGATGAATGTGA                          | 714 |
|      | ***** ** * ** * ** * ** * ** * ** * ** * ** * ** * ** * ** * ** * ** * ** * **     |     |
| Int3 | -----                                                                              | 467 |
| Int4 | TAAGTACCTATGGTTAATACCACTGCTTGCTA                                                   | 747 |
| Int5 | TAAGTACCTATGGTTAATACCACTGCTTGCTA                                                   | 747 |

**Supplementary Figure S3.** Melting curve analysis to select an adequate housekeeping gene as normalization control of transcription in *B. bovis*, as determined by qPCR. Dissociation curves were obtained when primer pairs targeting topoisomerase (topo 1: a, e; topo 2: b, f), *gadph* (c, g) or actin (d, h) and plasmid (a-d) or cDNA from AS and SS (e-h), and StepOne Software v2.3 were employed.

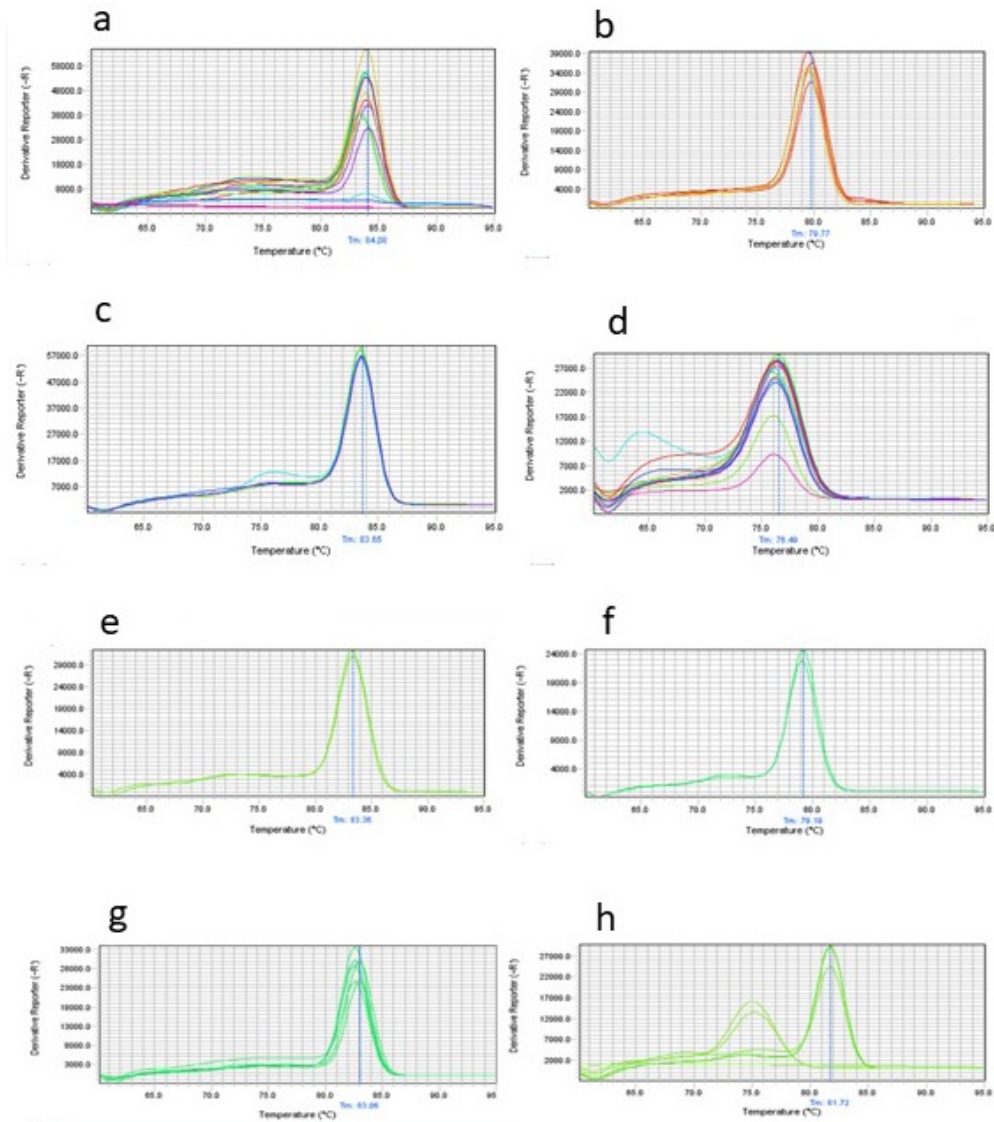

**Supplementary Figure S4.** Clustal omega alignment of nucleotide sequences of *rom4.5* alleles of *Babesia bovis* T2B and R1A. Note total conservation along the sequences with the exception of a region of different length which encodes the 29-aa repeats.

|      |                                                               |      |
|------|---------------------------------------------------------------|------|
| R1A  | ATGGGAGATAATGATTGCAATGATAAAGAAGATGCTAATAGGCATTCACCTAACGCTATT  | 60   |
| T2B  | ATGGGAGATAATGATTGCAATGATAAAGAAGATGCTAATAGGCATTCACCTAACGCTATT  | 60   |
|      | *****                                                         |      |
| R1A  | AAAGCGGTTTTGTGAAGGATATGGTGAATCGGGGATTCAGGAAGAAGATTAATGATAGT   | 120  |
| T2B  | AAAGCGGTTTTGTGAAGGATATGGTGAATCGGGGATTCAGGAAGAAGATTAATGATAGT   | 120  |
|      | *****                                                         |      |
| R1A  | GATAAGAATGATGATAGCAAGAGGATAAAGGTGGAGAAAAACCGAGTAACGTGTCGAAG   | 180  |
| T2B  | GATAAGAATGATGATAGCAAGAGGATAAAGGTGGAGAAAAACCGAGTAACGTGTCGAAG   | 180  |
|      | *****                                                         |      |
| R1A  | GATTCGTCGCTATGAAAGCTGGTAATGTGGCTGCTTTGAGAGATCAATTCAAGCGTCT    | 240  |
| T2B  | GATTCGTCGCTATGAAAGCTGGTAATGTGGCTGCTTTGAGAGATCAATTCAAGCGTCT    | 240  |
|      | *****                                                         |      |
| R1A  | GCTGAGAAAGATGAATCTAAAGACCAAAATTCGCAAGCTGGGCAGAGCAGCTTAACCTCG  | 300  |
| T2B  | GCTGAGAAAGATGAATCTAAAGACCAAAATTCGCAAGCTGGGCAGAGCAGCTTAACCTCG  | 300  |
|      | *****                                                         |      |
| R1A  | AAGGCTCCTCTTGGTGATCCGAGAAGCTGATCAACGAGCAGGCAAAATTCCTCGCAGAG   | 360  |
| T2Bo | AAGGCTCCTCTTGGTGATCCGAGAAGCTGATCAACGAGCAGGCAAAATTCCTCGCAGAG   | 360  |
|      | *****                                                         |      |
| R1A  | AAATATGAAAAAATATTGGCTGCCCGTAACATGGTGAAGAGTCCGCCAGTCGTGCATTG   | 420  |
| T2Bo | AAATATGAAAAAATATTGGCTGCCCGTAACATGGTGAAGAGTCCGCCAGTCGTGCATTG   | 420  |
|      | *****                                                         |      |
| R1A  | CAGCGCCAGCGACGAGTACACCAGCAAGATACCGGCTCTGTATCTGGTGTTCGAAA      | 480  |
| T2B  | CAGCGCCAGCGACGAGTACACCAGCAAGATACCGGCTCTGTATCTGGTGTTCGAAA      | 480  |
|      | *****                                                         |      |
| R1A  | GAACCTAAAGACACCAGCGAACAACCTAGGCCATCGAAAGCTGAACCTCGACCTAGTACC  | 540  |
| T2B  | GAACCTAAAGACACCAGCGAACAACCTAGGCCATCGAAAGCTGAACCTCGACCTAGTACC  | 540  |
|      | *****                                                         |      |
| R1A  | ACACCATCTACCTCCTTAGGTCACACAAGAACCTAAAGACACCAGCGAACAACCTAGGCCA | 600  |
| T2B  | ACACCATCTACCTCCTTAGGTCACACAAGAACCTAAAGACACCAGCGAACAACCTAGGCCA | 600  |
|      | *****                                                         |      |
| R1A  | TCGAAAGCTGAACCTCGACCTAGTACCACCATCTACCTCCTTAGGTCACACAAGAACCT   | 660  |
| T2B  | TCGAAAGCTGAACCTCGACCTAGTACCACCATCTACCTCCTTAGGTCACACAAGAACCT   | 627  |
|      | *****                                                         |      |
| R1A  | AAAGACACCAGCGAACAACCTAGGCCATCGAAAGCTGAACCTCGACCTAGTACCACACCA  | 720  |
| T2B  | -----                                                         | 627  |
|      | -----                                                         |      |
| R1A  | TCTACCTCCTTAGGTCACACAAGAACCTAAAGACACCAGCGAACAACCTAGGCCATCGAAA | 780  |
| T2B  | -----                                                         | 627  |
|      | -----                                                         |      |
| R1A  | GCTGAACCTCGACCTAGTACCACCATCTACCTCCTTAGGTCACACAAGAACCTAAAGAC   | 840  |
| T2B  | -----                                                         | 627  |
|      | -----                                                         |      |
| R1A  | ACCAGCGAACAACCTAGGCCATCGAAAGCTGAACCTCGACCTAGTACCACCATCTACC    | 900  |
| T2B  | -----                                                         | 627  |
|      | -----                                                         |      |
| R1A  | TCCTTAGGTCACACAAGAACCTAAAGACACCAGCGAACAACCTAGGCCATCGAAAGCTGAA | 960  |
| T2B  | -----                                                         | 627  |
|      | -----                                                         |      |
| R1A  | CCTCGACCTAGTACCACCATCTACCTCCTTAGGTCACACAAGAACCTAAAGACACCAGC   | 1020 |
| T2B  | -----                                                         | 627  |
|      | -----                                                         |      |
| R1A  | GAACAACCTAGGCCATCGAAAGCTGAACCTCGACCTAGTACCACCATCTACCTCCTTA    | 1080 |
| T2B  | -----ACACCATCTACCTCCTTA                                       | 645  |
|      | *****                                                         |      |
| R1A  | GGTCCACAAGAACCTAAAGACACCAGCGAACAACCTAGGCCATCGAAAGCTGAACCTCGA  | 1140 |
| T2B  | GGTCCACAAGAACCTAAAGACACCAGCGAACAACCTAGGCCATCGAAAGCTGAACCTCGA  | 705  |
|      | *****                                                         |      |
| R1A  | CCTAGTACCACCATCTACCTCCTTAGGTCACACAAGAACCTAAAGACACCAGCGAACA    | 1200 |
| T2B  | CCTAGTACCACCATCTACCTCCTTAGGTCACACAAGAACCTAAAGACACCAGCGAACA    | 765  |
|      | *****                                                         |      |
| R1A  | CCAGATCATCGAAAGCTGAGTCCAAATTGAGTACTACACTATCAAATGAGATTCCTCT    | 1260 |
| T2B  | CCAGATCATCGAAAGCTGAGTCCAAATTGAGTACTACACTATCAAATGAGATTCCTCT    | 825  |
|      | *****                                                         |      |
| R1A  | CGTGAATCCCGATCAGTGATTAAGGTACGGGCTCTTTGGCGGTTTCATCTCAGGTAAGC   | 1320 |
| T2Bo | CGTGAATCCCGATCAGTGATTAAGGTACGGGCTCTTTGGCGGTTTCATCTCAGGTAAGC   | 885  |
|      | *****                                                         |      |
| R1A  | TCCAATGCTGGTCGTCGTTTCACTTTGGCGGACACTGCTCCACTGATGACGCTAGT      | 1380 |
| T2B  | TCCAATGCTGGTCGTCGTTTCACTTTGGCGGACACTGCTCCACTGATGACGCTAGT      | 945  |
|      | *****                                                         |      |
| R1A  | ATTAGACAGGCTATGTCCCAATCCTTTCCAGCCCTGGTGTAGTCAGCCAGCAACCC      | 1440 |
| T2B  | ATTAGACAGGCTATGTCCCAATCCTTTCCAGCCCTGGTGTAGTCAGCCAGCAACCC      | 1005 |
|      | *****                                                         |      |

|      |                                                                         |      |
|------|-------------------------------------------------------------------------|------|
| R1A  | GAGCGTGCCTCGCGTGGCCGTAACATGTTTGGTATGCGTCGCGTCCATGTTGGATTGCT             | 1500 |
| T2B  | GAGCGTGCCTCGCGTGGCCGTAACATGTTTGGTATGCGTCGCGTCCATGTTGGATTGCT<br>*****    | 1065 |
| R1A  | ATTCAAGTGAAGGAGAAGATATTTCCCGGTAAGATGATATTTGGCAATCAGTACTACAATA           | 1560 |
| T2B  | ATTCAAGTGAAGGAGAAGATATTTCCCGGTAAGATGATATTTGGCAATCAGTACTACAATA<br>*****  | 1125 |
| R1A  | CTGATAATTGTTGTTTTTATGTTTGTAGTTATTCATCAACAGAGCTACCTTTAACGGTCGC           | 1620 |
| T2B  | CTGATAATTGTTGTTTTTATGTTTGTAGTTATTCATCAACAGAGCTACCTTTAACGGTCGC<br>*****  | 1185 |
| R1A  | TGTATAGTGAAGTGGATTATACTCACAGACATGAGGGTAAAGCTATCTTATCATACCTG             | 1680 |
| T2B  | TGTATAGTGAAGTGGATTATACTCACAGACATGAGGGTAAAGCTATCTTATCATACCTG<br>*****    | 1245 |
| R1A  | GGTTATGTTGGTGTGAGAATAACCTCAAAACAACCTGCTGCCGAACGTGGATTCCCTGGT            | 1740 |
| T2B  | GGTTATGTTGGTGTGAGAATAACCTCAAAACAACCTGCTGCCGAACGTGGATTCCCTGGT<br>*****   | 1305 |
| R1A  | GCTGGAGCGAGTGATAAAGGCTATCCAGTTGATTATGTGCATAAAGGGAATTTGGCAACT            | 1800 |
| T2B  | GCTGGAGCGAGTGATAAAGGCTATCCAGTTGATTATGTGCATAAAGGGAATTTGGCAACT<br>*****   | 1365 |
| R1A  | TCACTTGCCTCCTCGACGGACCTAATTACCGTATAGGCCTATTTGGCGCACTATCG                | 1860 |
| T2Bo | TCACTTGCCTCCTCGACGGACCTAATTACCGTATAGGCCTATTTGGCGCACTATCG<br>*****       | 1425 |
| R1A  | GCTAATACAATTCGTATCTATGGAGAGTCCTCTAGTTGCTTACTTCCATATCTTACAT              | 1920 |
| T2B  | GCTAATACAATTCGTATCTATGGAGAGTCCTCTAGTTGCTTACTTCCATATCTTACAT<br>*****     | 1485 |
| R1A  | GGAGGAAGTGGCATCTCTTTGTAATTGTTTGTATGAACATGTTGCTTCTCTATGTGATT             | 1980 |
| T2B  | GGAGGAAGTGGCATCTCTTTGTAATTGTTTGTATGAACATGTTGCTTCTCTATGTGATT<br>*****    | 1545 |
| R1A  | GAGCCGGTAAGTGGCCACTTTTGTGTTTGTCTAATCATATTTAGGACTGGGGATTCAAACG           | 2040 |
| T2B  | GAGCCGGTAAGTGGCCACTTTTGTGTTTGTCTAATCATATTTAGGACTGGGGATTCAAACG<br>*****  | 1605 |
| R1A  | CACATTAGCGCTGTATATATCGGTGGTTACAGTGCCAACTGGTTCACGCCAGTATGTC              | 2100 |
| T2B  | CACATTAGCGCTGTATATATCGGTGGTTACAGTGCCAACTGGTTCACGCCAGTATGTC<br>*****     | 1665 |
| R1A  | TCCTTGTATCCCATGCTGGGGAGCTTCTGGGTCAGTGTAGTTTGTATGGAGCATTGAT              | 2160 |
| T2B  | TCCTTGTATCCCATGCTGGGGAGCTTCTGGGTCAGTGTAGTTTGTATGGAGCATTGAT<br>*****     | 1725 |
| R1A  | TCCTTACACGGTAGAGCATTGGGACAACCTGAGATCACCATGGCTCTAATTGTCATAGC             | 2220 |
| T2B  | TCCTTACACGGTAGAGCATTGGGACAACCTGAGATCACCATGGCTCTAATTGTCATAGC<br>*****    | 1785 |
| R1A  | CATAACAATCTCTCTCTGGAATAATATACCAGGAGTAGGCGTTAGTAATCATGCCCA               | 2280 |
| T2B  | CATAACAATCTCTCTCTGGAATAATATACCAGGAGTAGGCGTTAGTAATCATGCCCA<br>*****      | 1845 |
| R1A  | CTTGGTAGGTTTTTATTGCTATGTTAATGAATACACAGGGTGGTTTTGCGTTTGGTTTG             | 2340 |
| T2B  | CTTGGTAGGTTTTTATTGCTATGTTAATGAATACACAGGGTGGTTTTGCGTTTGGTTTG<br>*****    | 1905 |
| R1A  | TGTTTCGGTTTCGCCACATTGAAATCAGTATCTGCGTTTGACCGTGGTGCCTTGTGGTCA            | 2400 |
| T2B  | TGTTTCGGTTTCGCCACATTGAAATCAGTATCTGCGTTTGACCGTGGTGCCTTGTGGTCA<br>*****   | 1965 |
| R1A  | CGTATAGCACTTCGGTTTTCTAGTAGGCTTTCACCAGAGCCGTCGAGAACACCAAGCC              | 2460 |
| T2B  | CGTATAGCACTTCGGTTTTCTAGTAGGCTTTCACCAGAGCCGTCGAGAACACCAAGCC<br>*****     | 2025 |
| R1A  | AAGGTTGTGAAGAGTCTCAGTCAGAGGAGATTCTGCGTATTAATATGAGCAGGTGCT               | 2520 |
| T2B  | AAGGTTGTGAAGAGTCTCAGTCAGAGGAGATTCTGCGTATTAATATGAGCAGGTGCT<br>*****      | 2085 |
| R1A  | AAGGATAGTGTCTAATCGTCTTCGCTTTGTCAAGCGTATGTTTCGGTATATATCCCTATGGC          | 2580 |
| T2B  | AAGGATAGTGTCTAATCGTCTTCGCTTTGTCAAGCGTATGTTTCGGTATATATCCCTATGGC<br>***** | 2145 |
| R1A  | CCATACCGTATGAGGCTGCGTGTACTTACTCGCGTTGTATTCCTTTGTGCCCTAGTA               | 2640 |
| T2B  | CCATACCGTATGAGGCTGCGTGTACTTACTCGCGTTGTATTCCTTTGTGCCCTAGTA<br>*****      | 2205 |
| R1A  | AGTCAACCGGTAATTACATACACTCCTGAGCAGATCGCGATGTTTGTATCTTCTATTG              | 2700 |
| T2B  | AGTCAACCGGTAATTACATACACTCCTGAGCAGATCGCGATGTTTGTATCTTCTATTG<br>*****     | 2265 |
| R1A  | GCGACTTCTATGAAAGCGTCTATAAGAATATAGATAGGAATGCAACGACTTTTCTCT               | 2760 |
| T2B  | GCGACTTCTATGAAAGCGTCTATAAGAATATAGATAGGAATGCAACGACTTTTCTCT<br>*****      | 2325 |
| R1A  | CGTGCCCTGCCATTGCGGCTATTTCAAATCATCTGGTGTAGGTTGTTAATCAAATA                | 2820 |
| T2B  | CGTGCCCTGCCATTGCGGCTATTTCAAATCATCTGGTGTAGGTTGTTAATCAAATA<br>*****       | 2385 |
| R1A  | GGCAACCTAGCTGGCAAATTCATTTGTTTCGATTGAGAAAGCGCCAGGGATAAGTTCTGT            | 2880 |
| T2B  | GGCAACCTAGCTGGCAAATTCATTTGTTTCGATTGAGAAAGCGCCAGGGATAAGTTCTGT<br>*****   | 2445 |
| R1A  | GCTGTTCTGGTTGAACCGGTTAACATGTATCAGTACATGCTGAACTTTTCATCATT                | 2939 |
| T2B  | GCTGTTCTGGTTGAACCGGTTAACATGTATCAGTACATGCTGAACTTTTCATCATT<br>*****       | 2504 |

**Supplementary Figure S5.** Clustal omega alignment of the N-terminal region of ROM4.5 of *Babesia bovis* T2Bo and R1A. Repeats in the R1A sequence are highlighted with different colors and the aa in the conserved motifs that flank the repeats' region are shown in red.

```

Rom4.1_R1A      MGDNDSNDKKNANRHSLNAIKGGFVKDMVNRGFRKKINDSDKNDDSKEDKGGKEKPSNVSK 60
Rom4.1_T2B      MGDNDSNDKKNANRHSLNAIKGGFVKDMVNRGFRKKINDSDKNDDSKEDKGGKEKPSNVSK 60
*****

Rom4.1_R1A      DSSSMKAGNVAALRDQFKRAAEKDESKDQNSQAGQSSLTSKAPLGDPRTDQRARAKFLAE 120
Rom4.1_T2B      DSSSMKAGNVAALRDQFKRAAEKDESKDQNSQAGQSSLTSKAPLGDPRTDQRARAKFLAE 120
*****

Rom4.1_R1A      KYEKILAARNMVEESASRALQRPATSTPAKIPASVSGVSKEPKDTSEQPRPSKAEPRPST 180
Rom4.1_T2B      KYEKILAARNMVEESASRALQRPATSTPAKIPASVSGVSKEPKDTSEQPRPSKAEPRPST 180
*****

Rom4.1_R1A      TPSTSLGPQEPKDTSEQPRPSKAEPRPSTTPSTSLGPQEPKDTSEQPRPSKAEPRPSTTP 240
Rom4.1_T2B      TPSTSLGPQEPKDTSEQPRPSKAEPRPSTTP----- 211
*****

Rom4.1_R1A      STSLGPQEPKDTSEQPRPSKAEPRPSTTPSTSLGPQEPKDTSEQPRPSKAEPRPSTTPST 300
Rom4.1_T2B      ----- 211

Rom4.1_R1A      SLGPQEPKDTSEQPRPSKAEPRPSTTPSTSLGPQEPKDTSEQPRPSKAEPRPSTTPSTSI 360
Rom4.1_T2B      -----STSL 215
*****

Rom4.1_R1A      GPQEPKDTSEQPRPSKAEPRPSTTPSTSLGPQEPKDTSEQPRSSKAESKLSTTL SKLRF 420
Rom4.1_T2B      GPQEPKDTSEQPRPSKAEPRPSTTPSTSLGPQEPKDTSEQPRSSKAESKLSTTL SKLRF 275
*****

Rom4.1_R1A      RESRSVIKGTGSFGSSQVSSNAGRRVHTLADTASTDDASIRQAMSQSFSSPGVSPQPEQP 480
Rom4.1_T2B      RESRSVIKGTGSFGSSQVSSNAGRRVHTLADTASTDDASIRQAMSQSFSSPGVSPQPEQP 335
*****

Rom4.1_R1A      ERASRGRNMFGRRRPCWIRIQVKEKIFPGKM          512
Rom4.1_T2B      ERASRGRNMFGRRRPCWIRIQVKEKIFPGKM          367
*****

```

**Supplementary Figure S6.** Analysis of polymorphism and synonymous and non-synonymous substitutions in the repeat region of ROM4.5. **A.** Nucleotide sequence variants encoding for 29 aa-repeats in different *Babesia bovis* geographical isolates. The sequence shown for T2B is 100% conserved in all analyzed American isolates. When different sequences were found in an isolate, they are designated with letters. The results of the SNAP analysis to find the average dN/dS are shown below. **B.** Clustal omega alignment of the 29 aa peptides encoded by the nucleotide sequences shown in A. Asterisks at the bottom mark conserved positions between all sequences, colons mark conserved substitutions and absence of a sign corresponds to non-conserved substitutions.

**A**

|      |                                                                                          |
|------|------------------------------------------------------------------------------------------|
| T2B  | GAACCTAAAGACACCAGCGAACAACCTAGGCCATCGAAAGCTGAACCTCGACCTAGTACCACACCATCTACCTCCTTAGGTCCACAA  |
| SA2  | GAACCTAAAGACACCAGCGAACAACCTAGGCCATCGAAAGCTGAACCTCGACCTAGTACCACACCATCTACTTCGTTAGGTCCACAA  |
| I3A  | GAAATGAAAGGTAGCAGTGAACAACCTAAGCCATCTAAAAGTGAAGTCTCGACCTAGTACTACACCGTCTACTTCGTTAGGTCCACAA |
| I3B  | GAAGTAAAGAAACTAGTGAACAACCTAAGCCATCTAAAAGTGAAGTCTCGACCTAGTACTACACCGTCTACTTCGTTAGGTCCACAA  |
| I3C  | GAAGTAAAGAAACTAGTGAACAACCTAGGCCATCTAAAAGTGAAGTCTCGACCTAGTACTACACCGTCTACTTCGTTAGGTCCACAA  |
| I3D  | GAAGTAAAGAAACTAGTGAACAACCTAGGCCATCTAAAAGTGAAGTCTCGACCTAGTACTACACCGTCTACTTCGTTAGGTCCACAA  |
| A1A  | GAAATGAAAGGTAGCAGTGAAGCAGCCTAGGCCATCGAAAGGTGAACCTCGTCCTAGTACCACACCATCTACTTCCTTAGGTCAACAA |
| A1B  | GAAGCTAAAGACATTAGTGAGCAGCCTAGGCCATCGAAAGGTGAACCTCGTCCTAGTACCACACCATCTACTTCCTTAGGTCAACAA  |
| A1C  | GAAGCTAAAGACATCAGTGAAAAGCCTAGGCCATCGAAAGGTGAACCTCGTCCTAGTACCACACCATCTACTTCCTTAGGTCAACAA  |
| A15A | GAAATGAAAGGTAGCAGTGAAGCAGCCTAGGCCATCGAAAGGTGAACCTCGTCCTAGTACCACACCATCTACTTCCTTAGGTCAACAA |
| A15B | GAAGCTAAAGACATTAGTGAGCAGCCTAGGCCATCGAAAGGTGAACCTCGTCCTAGTACCACACCATCTACTTCCTTAGGTCAACAA  |
| A15C | GAAGCTAAAGACATTAGTGAAAAGCCTAGGCCATCGAAAGGTGAACCTCGTCCTAGTACCACACCATCTACTTCCTTAGGTCAACAA  |
| A15D | GAAGCTAAAGACATTAGTGAGCAACCTAGGCCATCGAAAGGTGAACCTCGACCTAGTACCACACCATCTACTTCCTTAGGTCCACAA  |

SNAP results: Averages of all pairwise comparisons: dS = 0.3854, dN = 0.0947, dN/dS = 0.24

**B**

```
A1C      EAKDISEKPRPSKGEPRPSTTPSTSLGQQ      29
A15C     EAKDISEKPRPSKGEPRPSTTPSTSLGQQ      29
T2B      EPKDTSEQPRPSKAEPRPSTTPSTSLGPQ      29
SA2      EPKDTSEQPRPSKAEPRPSTTPSTSLGPQ      29
A1B      EAKDISEQPRPSKAEPRPSTTPSTSLGQQ      29
A15B     EAKDISEQPRPSKAEPRPSTTPSTSLGQQ      29
A15D     EAKDISEQPRPSKAEPRPSTTPSTSLGPQ      29
A1A      EMKGSSEQPRPSKGEPRPSTTPSTSLGQQ      29
A15A     EMKGSSEQPRPSKGEPRPSTTPSTSLGQQ      29
I3A      EMKGSSEQPKPSKTESRPSTTPSTSLGPQ      29
I3D      EVKETSEQPRPSKTESRPSTAPSTSLGPQ      29
I3B      EVKETSEQPKPSKTESRPSTTPSTSLGPQ      29
I3C      EVKETSEQPRPSKTESRPSTTPSTSLGPQ      29
          * *  ** : * . *** * **** : ***** *
```

**Supplementary Figure S7.** Clustal omega alignment between N-terminal regions of ROM4.5 of the Mexican Mo7 strain and the Australian A15 strain of *Babesia bovis*. The repeat region is marked by square brackets. The conserved aa motifs flanking the repeats' region are in red.

```
ROM4.5_A15      MGDNDSNEKKNAGRHSLSAIKGGFVKDMVNRGFRKKVNDSDKNDEGKEDKSGDKPTNVSK 60
ROM4.5_Mo7      MGDNDSNEKKNAGRHSLSNAIKGGFVKDMVNRGFRKKVNDSDKNDESKEDKGGDKPTNVSK 60
          ***** . ***** . ***** . *****

ROM4.5_A15      DTSSMKAGNVAALRDQFKRAVEKDESKDQNSQAGQSSLTSKAPLGDPRDQARAKFLAE 120
ROM4.5_Mo7      DTSSMKSGNVAALRDQFKRAVEKDDSKDQNSQAGQSSSTSKAPLGDPRDQARAKFLAE 120
          ***** : ***** : ***** *****

ROM4.5_A15      KYEKILAARNMVEESASRALQRPATNTPAKIIPPSVSGVSKEMKGSSEQPRPSKAEPRPST 180
ROM4.5_Mo7      KYEKILAARNMVEESASRALQRPATSTPAKIIPPSVSGVSKEPKDTSEQPRPSKAEPRPST 180
          ***** . ***** * . *****

ROM4.5_A15      TPSTSLGQQEAKDISEQPRPSKAEPRPSTTPSTSLGQQEAKDISEKPRPSKAEPRPSTTP 240
ROM4.5_Mo7      TPSTSLGPQE----- 190
          ***** **

ROM4.5_A15      STSLGQQEAKDISEQPRPSKAEPRPSTTPSTSLGPQEAKDISEQPRPSKAEPRPSTTPST 300
ROM4.5_Mo7      -----PKDTSSEQPRPSKAEPRPSTTPSTSLGPQEPKDTSEQPRPSKAEPRPSTTPST 242
          ** ***** ** *****

ROM4.5_A15      SLGPQEAKDISEQPRPSKAESKLSTALSKLRSSRESRSVIKGTGSFGGSSQVSSSAGRRV 360
ROM4.5_Mo7      SLGPQEPKDTSEQPRPSKAESKLSTTLSKLRFSRESRSVIKGTGSFGGSSQVSSNAGRRV 302
          ***** ** ***** : ***** *****

ROM4.5_A15      HTLADTASTDDASIRQALSQSFSSPGVSEQPERGSRGRNMFGMRRRPCWIRIQVKEKI 420
ROM4.5_Mo7      HTLADTASTDDASIRQAMSQSFSSPDVSHPEQPERASRGRNMFGMRRRPCWIRIQVKEKI 362
          ***** : ***** . ** : ***** . *****

ROM4.5_A15      FPGKM      425
ROM4.5_Mo7      FPGKM      367
          *****
```

**Supplementary Figure S8.** PCR and RT-PCR amplification of *Babesia bovis rom4.3/4.4*. DNA (g) or RNA (+, -) extracted from AS (A) or SS (B) were used as templates for PCR and RT-PCR amplification of *rom4.3/4.4* genes or transcripts, respectively. M: DNA ladder; the arrows mark the 500 bp band; b: blank without DNA template; + reaction with reverse transcriptase; - reaction without reverse transcriptase. A band corresponding to the expected size (259 bp) was only obtained when reverse transcriptase was added to the RT-PCR reaction, showing that the AS and SS RNA preparations were free of DNA contamination.

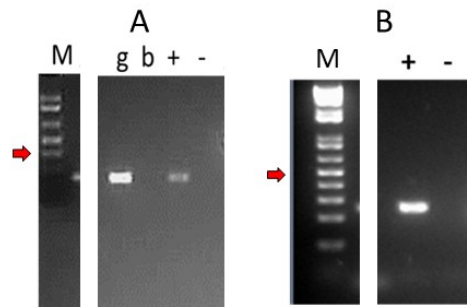



**Supplementary Figure S9.** Scheme of PCR amplification of *rom4* alleles for polymorphism analysis. A: *rom4.1*, B: *rom4.2*, C: *rom4.3/4.4*, D: *rom4.5*

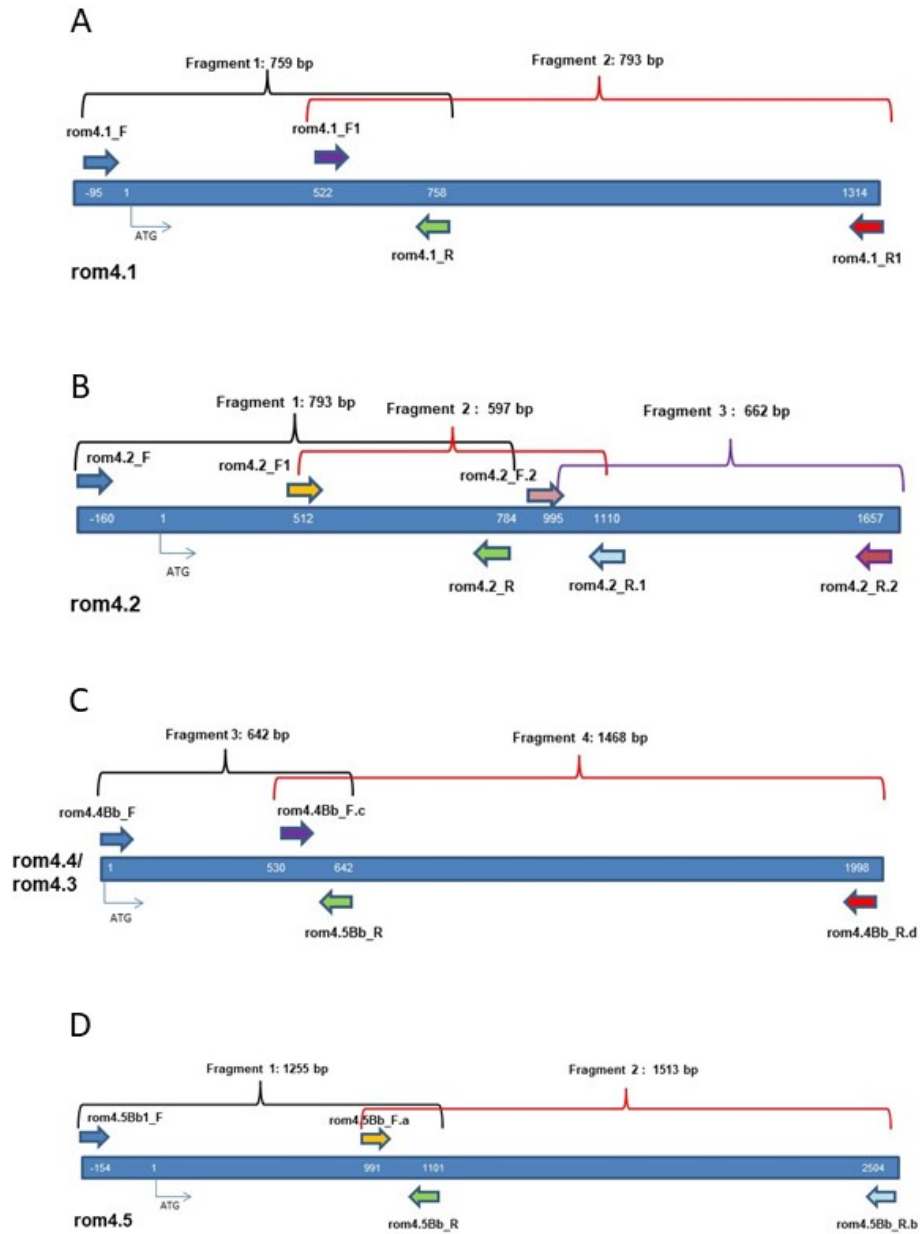

**Supplementary Table S1.** Oligonucleotides used in qRT-PCR

| Gene                                                              | Primer name              | Sequence                                        | T<br>(°C)    | Length<br>(bp) |
|-------------------------------------------------------------------|--------------------------|-------------------------------------------------|--------------|----------------|
| <i>rom4.1</i><br>BBOV_II006100                                    | rom4.1_F<br>rom4.1_R     | CACTCATATCGTGGGCATTG<br>CATGTTTTTGGGCCATATCC    | 59.9<br>59.8 | 125            |
| <i>rom4.2</i><br>BBOV_II006070                                    | rom4.2_F<br>rom4.2_R     | CAGGCGTACATTTTGGGTTT<br>AGGCGATCCCATCCTATACC    | 59.9<br>59.7 | 74             |
| <i>rom4.4</i><br>BBOV_II005940/<br><i>rom4.3</i><br>BBOV_II005950 | rom4.2/3_F<br>rom4.2/3_R | TCGCATTCGTTAGCATTGAG<br>CGGTCAAACGCAGATACTGA    | 59.9<br>59.8 | 126            |
| <i>rom4.5</i><br>BBOV_II005930                                    | rom4.5_F<br>rom4.5_R     | GGCAACTTCACTTGCTCCTC<br>TAGTGCGCCAACAATAGTGC    | 60<br>59.9   | 64             |
| <i>topoisomerase II</i><br>BBOV_III004820                         | topo1_F<br>topo1_R       | GGGATAGGTACAGGATTCAGC<br>TCCGTTTTTCATCTAGCCACTG | 61<br>64     | 197            |
|                                                                   | topo2_F<br>topo2_R       | CAGGACAGAGGAAGGTGCTC<br>CCATGGTGGTATGCAGAGTG    | 60<br>60     | 109            |
| <i>actin</i><br>BBOV_IV009790                                     | actin_F<br>actin_R       | ACCAGGCTGAACCGCTACTA<br>TCATCAAAAACGGAAGCTCCT   | 60<br>60     | 240            |
| <i>gadph</i><br>BBOV_II002540                                     | gadph_F<br>gadph_R       | TTGGTTCTCCGTGCTTCTTT<br>GGAATCTGAGAAGGCTCACG    | 60<br>60     | 209            |

**Supplementary Table S2.** Ct and efficiency values obtained by qPCR targeting potential reference genes of *Babesia bovis*. The housekeeping genes *topoisomerase*, *gadph* and *actin* were tested by qPCR using specific primers and (A) plasmid DNA and (B) AS or SS cDNA as template. The primers used are shown in Table S1. Each determination was done in triplicates (Ct1, Ct2 and Ct3). Efficiency was calculated using the absolute fluorescence increase method with LinRegPCR software.

**A**

| Primer pair | Ct 1   | Ct 2   | Ct 3   | Mean Ct | Mean efficiency | Mean efficiency % |
|-------------|--------|--------|--------|---------|-----------------|-------------------|
| topo 1      | 24.537 | 24.469 | 23.960 | 24.32   | 1.825           | 82.5              |
| topo 2      | 18.009 | 18.367 | 18.153 | 18.18   | 1.881           | 88.1              |
| gadph       | 22.199 | 21.832 | 22.207 | 22.08   | 1.807           | 80.7              |
| actin       | 25.168 | 26.055 | 25.497 | 25.57   | 1.868           | 86.8              |

**B**

| Primer pair | Mean CT of AS | Mean CT of SS | SS/AS ratio | Mean efficiency | Mean efficiency % |
|-------------|---------------|---------------|-------------|-----------------|-------------------|
| topo 1      | 32.99         | 30.72         | 0.93        | 1.936           | 93.6              |
| topo 2      | 33.38         | 32.99         | 0.99        | 1.931           | 93.1              |
| gadph       | 34.8          | 25.64         | 0.74        | 1.934           | 93.4              |
| actin       | 31.65         | 35.52         | 1.12        | 1.934           | 93.4              |

**Supplementary Table S3.** Information on *Babesia bovis* strains and isolates used to study *rom4* sequence polymorphism

| Isolate/strain name | Region and/or country of origin | Characteristics         | Reference |
|---------------------|---------------------------------|-------------------------|-----------|
| T2Bo                | Texas, USA                      | Pathogenic <sup>a</sup> | [51]      |
| Mo7                 | Mexico                          | Pathogenic <sup>a</sup> | [52]      |
| R1A                 | Salta, Argentina                | Attenuated <sup>a</sup> | [53,54]   |
| S2P                 | Salta, Argentina                | Pathogenic <sup>a</sup> | [54,55]   |
| M2P                 | Corrientes, Argentina           | Mildly pathogenic       | [54]      |
| B4P                 | Rio Grande do Sul, Brazil       | Pathogenic              | [56]      |
| I3                  | Gonen, Israel                   | Attenuated              | [57]      |
| A1 (F71 plus1)      | North Queensland, Australia     | Mildly pathogenic       | [58]      |
| A15 (H92)           | Central Queensland, Australia   | Pathogenic              | [58]      |
| SA2 (RLB18/061)     | South Africa                    | unknown                 | -         |

**Supplementary Table S4.** Primers used to amplify *rom4* segments for polymorphism studies

| Primer       | Sequence                | Length (bp) | Tm (°C) |
|--------------|-------------------------|-------------|---------|
| rom4.1_F     | CCTCCATAGTAGTTGGAAGC TC | 579         | 58      |
| rom4.1_R     | ATGCGACGCGGAGTAACAC     |             | 61      |
| rom4.1_F1    | CTACGGCTAATCATCGTGTC    | 793         | 57      |
| rom4.1_R1    | CGGGCATGTAGTTCGTAATC    |             | 56      |
| rom4.2_F     | GATTGTATTGCGAACGGCACTG  | 793         | 61      |
| rom4.2_R     | CTCAACACAGTACGGTGCAA 3  |             | 58      |
| rom4.2_F1    | GGTTGTGGAAGCTATCTAGCTG  | 597         | 61      |
| rom4.2_R1    | GTGAATCGGTAGTATGGAATCC  |             | 58      |
| rom4.2_F2    | TGGCATAACGACACAATATTGTT | 662         | 57      |
| rom4.2_R2    | ACAACGAAAGAGAACCAGGA    |             | 57      |
| rom4.4Bb_F   | ATGGGAGATAATGATTCGAATG  | 642         | 62      |
| rom4.5Bb_R   | CATCTTACCGGGAAATATCTTC  |             | 54      |
| rom4.4Bb_F.c | TCAGCCAGAGCAACCCGAG     | 1468        | 62      |
| rom4.4Bb_R.d | TTATTTCTCACAAAAACATTCCA |             | 54      |
| rom4.5Bb1_F  | TGCGAGATATGCAACTCACGA   | 1255        | 60      |
| rom4.5Bb_R   | CATCTTACCGGGAAATATCTTC  |             | 54      |
| rom4.5Bb_F.a | AGCCAGAGCAACCCGAGCG     | 1513        | 68      |
| rom4.5Bb_R.b | AATGATGAAAAGTTCAGCATGTA |             | 55      |
